# Supplementary material for: Evaluation of an Algorithm to Guide Patients With Type 1 Diabetes Treated With Continuous Subcutaneous Insulin Infusion on How to Respond to Real-Time Continuous Glucose Levels
Source: Oxford University Press journal article supplement (doi:10.2337/dc09-1481), 2010-03-09

**ALG-OS** (Evaluation of an **ALGO**rithm to Guide Patients with Type I Diabetes Treated with Continuous Subcutaneous Insulin Infusion on How to Respond to Real-Time Continuous Glucose Levels.) **Study Group:** *Southern Health:* Ms. M. Buszard, Mr. A. Lamendola, Assoc Prof. C. Rodda, Prof. H. Teede, Ms. M. Williamson; *Royal Children's Hospital:* Assoc. Prof. F. Cameron, Ms. R. Humphreys,, Dr. M. O'Connell; *Royal Melbourne Hospital:* Prof. P. Colman, Ms. E. Fitzgerald, Ms. K. Palmer, Ms. K. Steele; Western Hospital Footscray: Assoc. Prof. S. Hamblin, Ms. C. .Steele; *St Vincent's Hospital:* Prof. J. Best, Ms. J. Horsburgh, Assoc. Prof. A. Jenkins, Dr. B. Krishnamurthy, Dr. D. O'Neal.

## Appendix A (ALG-OS)

### (i) Wallet Card Advising Reactive Responses to RT-CGM Information.

**Front of short term adjustment card**

| <b>TREND<br/>ARROW</b> | <b>LOW<br/>( Below 4.0<br/>pre-meal or<br/>below 6.0<br/>after meal or<br/>bed-time)</b> | <b>TARGET<br/>(4.0-8.0 pre-meal<br/>or 6.0-10.0 after<br/>meal or bed-time)</b>                                                                    | <b>HIGH<br/>( more than<br/>8.0 pre-meal<br/>or more than<br/>10.0 after meal<br/>or bed-time)</b> |
|------------------------|------------------------------------------------------------------------------------------|----------------------------------------------------------------------------------------------------------------------------------------------------|----------------------------------------------------------------------------------------------------|
| ↑↑                     | Recheck in 10-15min                                                                      | Recheck in 1 hour<br>Confirm meal bolus<br>given.                                                                                                  | Line Check.<br>Ketone Check.<br>Correction<br>Bolus and<br>Recheck in 1-2<br>hrs                   |
| ↑                      | Eat, Recheck in<br>10-15 min                                                             | No Action                                                                                                                                          | Line Check.<br>Ketone Check.<br>Correction<br>Bolus and<br>Recheck in 1-2<br>hrs                   |
| No arrows              | EAT. Set temp<br>basal . Recheck<br>in 10-15 min                                         | No Action                                                                                                                                          | Correction<br>Bolus<br>Recheck in 1 hr                                                             |
| ↓                      | EAT. Set temp<br>basal . Recheck<br>in 10- 15 min                                        | 6.0-8.0 at bedtime<br>temp basal and<br>recheck in 1 hr                                                                                            | Recheck in 2<br>hrs. Consider<br>Correction<br>Bolus.                                              |
| ↓↓                     | EAT. Set temp<br>basal . Recheck<br>in 10-15 min                                         | 6.0-8.0 (Bedtime<br>below 10): EAT<br>(Consider temp<br>basal ) and recheck<br>in 30min.<br>4.0-6.0: EAT +<br>temp basal and<br>recheck in 15 min. | Recheck in 2<br>hrs.                                                                               |

**Back of short term adjustment card**

**Alarms** < 4.5 and >11.0

**Bolus Wizard Target Range** 5.0 – 8.0

**Insulin Sensitivity:** \_\_\_\_\_

(100 / Total Daily Insulin Dose = glucose drop for 1 unit insulin)

**Medtronic Pump Helpline:**

**Endocrinologist:** \_\_\_\_\_ **Ph:** \_\_\_\_\_

**Diabetes Nurse:** \_\_\_\_\_ **Ph:** \_\_\_\_\_

## (ii) Wall Chart Advising Prospective Responses to RT-CGM Information.

### ALG-OS WALL CHART

- Have you uploaded to Carelink in the last 7 days?
- Have you calculated your insulin sensitivity in the last 2 weeks?  
100/ average total daily dose = 1 Unit will drop glucose level by X mmol/L
- Are you using the Bolus Wizard?
- Address problems with hypoglycaemia first.
- Base your changes on information from more than one day.
- Consider that week days may be different from weekends.
- Have you had any low sugars that caused you symptoms in the last 7 days?

#### 1. Assess the basal rates: Use the Carelink Sensor Daily Overlay.

##### a) Look at the average overnight levels:

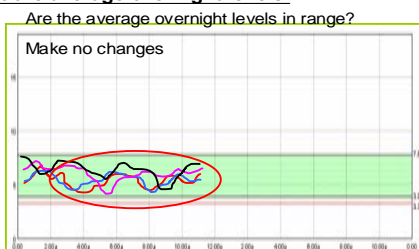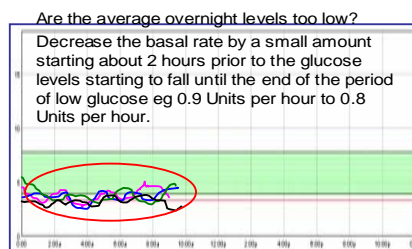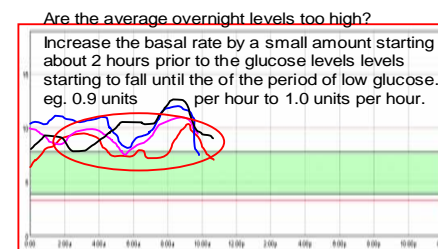

##### b) Look at each pre-meal (3-5 hours after the last meal) level separately.

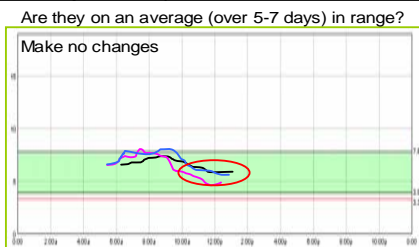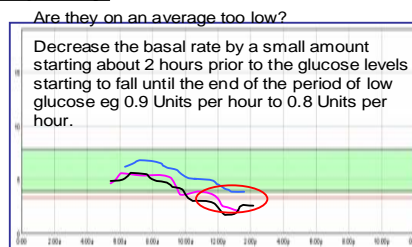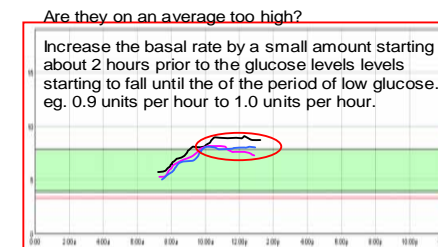

#### 2. Assess the bolus ratio: Use the Sensor Overlay by Meal and Meal Statistics/ Modal daily Blood Glucose by Period

Look at the 2-3 hour period after each meal or a snack separately. Are you carbohydrate counting accurately?

Are you adjusting your bolus profiles according to the composition of the meal? Do you need to change the sort of food you are eating?

Are the post meal readings on an average within 2mmol/L of the pre-meal readings?

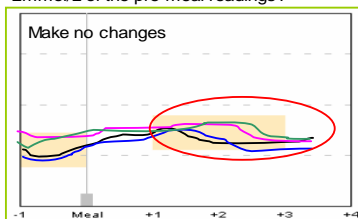

Are the post meal readings on an average less than 2mmol/L of the pre-meal readings?

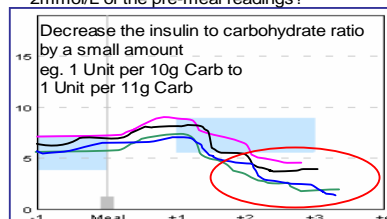

Are the post meal readings on an average greater than 2mmol/L of the pre-meal readings?

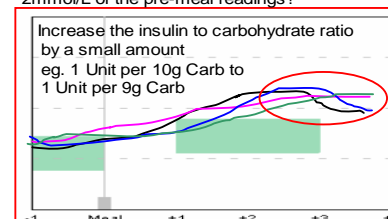

Supplement: dc091481-sup-1481onlineappendix.pdf [file dc091481-sup-1481onlineappendix.pdf]
